# Supplementary material
Source: PubMed Central journal article supplement (PMC3868453)
Supplement: NIHMS261026-supplement-01.pdf [file NIHMS261026-supplement-01.pdf]

### Primers used for genotyping and real-time RT-PCR

| Gene                      | Sense primer(s)                                    | Antisense primer(s)                                 |
|---------------------------|----------------------------------------------------|-----------------------------------------------------|
| <i>Bid</i>                | CAACATTGCCAGACATCTCGC                              | TGACAGTCGTGTGGAAGACATCAC                            |
| <i>Cdc6</i>               | AGTTCTGTGCCCGCAAAGTG                               | AGCAGCAAAGAGCAAACCAGG                               |
| <i>cry-cre</i>            | GCATTCCAGCTGCTGACG                                 | CAGCCCGGACCGACGATGAAG                               |
| <i>CycA2</i>              | CCCCCAGAAGTAGCAGACTTTGTG                           | TGTGACTGTGTAGAGAGCCAAGTGG                           |
| <i>CycE1</i>              | GAGCAGGAGACAGAATGACCAAAC                           | ACAGCAACCTACAACACCCGAG                              |
| <i>Dhfr</i>               | GTAGAGAACTCAAAGAACCACCACG                          | TTTTCTCTGGACCTCAGAGAG                               |
| <i>E2f1</i>               | AGAAGTCACGCTATGAAACCTCAC<br>AGTGCCAGCGGGGCTGCTAAAG | AGCCACTGGATATGATTCTTGGAC                            |
| <i>E2f2</i>               | CCTGAGCGAGTCGGAGGATGG<br>ACCAAAGAACGGAGCCGGTTGGCG  | GCCCCTAACACATGCACCCATTGG                            |
| <i>E2f3</i>               | TGTGAATAATTTTTGGCATGTTTT                           | AAGGGAAGGGAAAATTAATCTGA<br>CTTATTCTGAGTGTGGACATACCG |
| <i>Fas/CD95</i>           | CGAGAAAATAACATCAAGGAGGGC                           | TGCTGGCAAAGAGAACACACC                               |
| <i>Gadd45a</i>            | ACGACATCAACATCCTGCGG                               | CAAAGTCATCTCTGAGCCCTCG                              |
| <i>Gapdh</i>              | CGGTGTGAACGGATTTGGC                                | TTTGATGTTAGTGGGGTCTCGC                              |
| <i>Irdd/Pidd</i>          | GCACCGTGTGAATCTCATTGC                              | CAGGAAGTGAACCCCGATAAAAG                             |
| <i>Mcm3</i>               | CGCAGGAAGAATGAAAAGAGGG                             | CTGAGGAAGCAGGAAGTGAGAGTC                            |
| <i>p19<sup>Arf</sup></i>  | CACCGGAATCCTGGACCAG                                | GCAGTTCGAATCTGCACCGT                                |
| <i>p21<sup>Cip1</sup></i> | CTTGTCGCTGTCTTGCACTC                               | CTCCTGACCCACAGCAGAAG                                |
| <i>Pola</i>               | TCTTCCCCTTCATTCTCCCG                               | TCTTCCCCTTCATTCTCCCG                                |
| <i>Pcna</i>               | AGGCTCTCAAAGACCTCATCAATG                           | CCTGTTCTGGGATTCCAAGTTG                              |
| <i>ROSA26 Rep</i>         | AAAGTCGCTCTGAGTTGTTAT                              | GGAGCGGGAGAAATGGATAT<br>GCGAAGAGTTTGTCTCAACC        |
