# Supplementary material
Source: PubMed Central journal article supplement (PMC3868453)
Supplement: NIHMS261026-supplement-02.pdf [file NIHMS261026-supplement-02.pdf]

**A**

| Validated E2F target genes (regulated and bound by E2F transcription factors) |        |           |        |          |          |
|-------------------------------------------------------------------------------|--------|-----------|--------|----------|----------|
| ASF1B                                                                         | CDC25A | E2F3      | LMNB1  | PLK1     | RRM1     |
| BARD1                                                                         | CDC6   | FANCL     | MAP3K5 | POLD3    | SERPINE1 |
| BLM                                                                           | CDC7   | FEN1      | MCM3   | PRC1     | SMC2     |
| BNIP3                                                                         | CDCA3  | H2AFX     | MKI67  | RACGAP1  | SSX2IP   |
| BOK                                                                           | CDCA5  | HIST1H2AD | NASP   | RAD51    | TK1      |
| BRCA1                                                                         | CENPF  | HMGB2     | NRP1   | RAD51AP1 | TMPO     |
| BUB1                                                                          | CENPK  | HMMR      | NUF2   | RAD54L   | TOP2A    |
| BUB1B                                                                         | DLG7   | IQGAP3    | PBK    | RBL1     | TPX2     |
| CCDC5                                                                         | DNA2L  | KIF20A    | PBX3   | RFC3     | TYMS     |
| CCNA2                                                                         | E2F1   | KIF2C     | PCNA   | RFC4     | UBE2C    |

**B**

| GO category | GO ontology | GO term                                            | Number of genes    | Genes up in TKO | LS permutation p-value | KS permutation p-value |
|-------------|-------------|----------------------------------------------------|--------------------|-----------------|------------------------|------------------------|
| GO:0000776  | CC          | kinetochore                                        | <a href="#">48</a> | 30              | 0.00001                | 0.00001                |
| GO:0003899  | MF          | DNA-directed RNA polymerase activity               | <a href="#">71</a> | 43              | 0.00001                | 0.00001                |
| GO:0019205  | MF          | nucleobase, nucleoside, nucleotide kinase activity | <a href="#">63</a> | 35              | 0.00001                | 0.0000972              |
| GO:0030935  | CC          | sheet-forming collagen                             | <a href="#">12</a> | 0               | 0.00001                | 0.0003072              |
| GO:0030894  | CC          | replisome                                          | <a href="#">22</a> | 13              | 0.00001                | 0.0003131              |
| GO:0043596  | CC          | nuclear replication fork                           | <a href="#">22</a> | 13              | 0.00001                | 0.0003131              |
| GO:0043601  | CC          | nuclear replisome                                  | <a href="#">22</a> | 13              | 0.00001                | 0.0003131              |
| GO:0005657  | CC          | replication fork                                   | <a href="#">55</a> | 36              | 0.00001                | 0.0004025              |
| GO:0006270  | BP          | DNA replication initiation                         | <a href="#">26</a> | 24              | 0.0000968              | 0.0000995              |
| GO:0006305  | BP          | DNA alkylation                                     | <a href="#">48</a> | 27              | 0.0000975              | 0.00001                |
| GO:0006306  | BP          | DNA methylation                                    | <a href="#">48</a> | 27              | 0.0000975              | 0.00001                |
| GO:0019202  | MF          | amino acid kinase activity                         | <a href="#">5</a>  | 0               | 0.0000995              | 0.0004817              |
| GO:0006304  | BP          | DNA modification                                   | <a href="#">54</a> | 29              | 0.0004371              | 0.0000952              |
| GO:0019218  | BP          | regulation of steroid metabolic process            | <a href="#">22</a> | 10              | 0.000822               | 0.00033                |
