# Supplementary material
Source: PubMed Central journal article supplement (PMC3868453)

**A**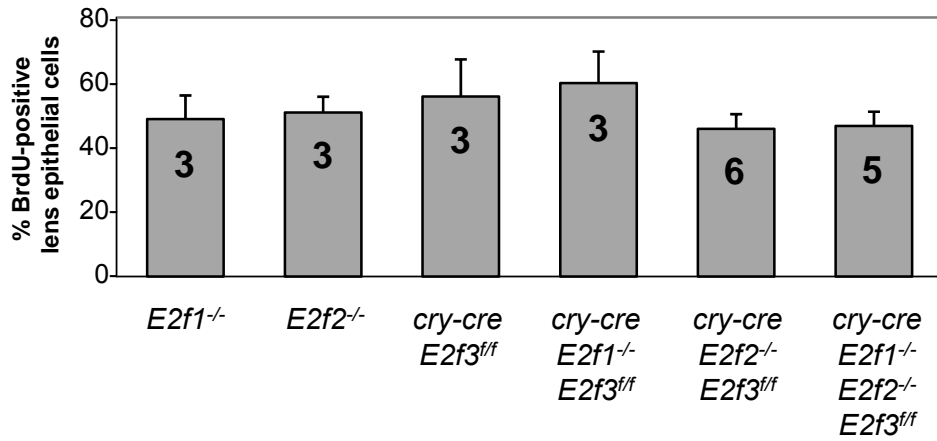**B**

Number of *cry-cre*; *E2f1*<sup>-/-</sup>; *E2f2*<sup>-/-</sup>; *E2f3*<sup>LoxP/LoxP</sup> embryos, neonates, and weanlings recovered for analysis of phenotype penetrance

| Age          | Total Number | Number with evidence of vacuolation |
|--------------|--------------|-------------------------------------|
| <i>E13.5</i> | 14           | 0                                   |
| <i>E14.5</i> | 2            | 0                                   |
| <i>E16.5</i> | 7            | 0                                   |
| <i>E17.5</i> | 10           | 0                                   |
| <i>E19.5</i> | 1            | 0                                   |
| <i>P0</i>    | 8            | 4                                   |
| <i>P1</i>    | 16           | 8                                   |
| <i>P4</i>    | 1            | 0                                   |
| <i>P7</i>    | 8            | 6                                   |
| <i>P16</i>   | 4            | 4                                   |
| <i>P21</i>   | 2            | 2                                   |

**C**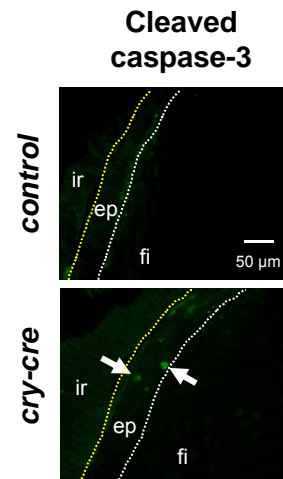**D**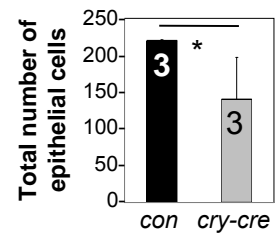

Supplement: NIHMS261026-supplement-05.pdf [file NIHMS261026-supplement-05.pdf]
