# Supplementary material
Source: PubMed Central journal article supplement (PMC3868453)
Supplement: NIHMS261026-supplement-06.pdf [file NIHMS261026-supplement-06.pdf]

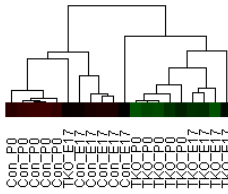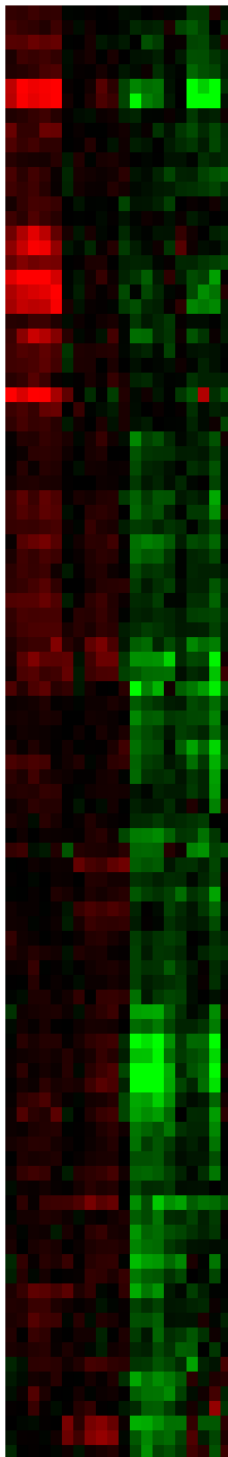

|                    |                                                             |
|--------------------|-------------------------------------------------------------|
| Pgcp               | plasma glutamate carboxypeptidase                           |
| Bnip3              | BCL2/adenovirus E1B interacting protein 1, NIP3             |
| Calca              | calcitonin/calcitonin-related polypeptide, alpha            |
| Hspg2              | perlecan (heparan sulfate proteoglycan 2)                   |
| Inhba              | inhibin beta-A                                              |
| Col4a4             | procollagen, type IV, alpha 4                               |
| Col4a4             | procollagen, type IV, alpha 4                               |
| Efcfbp1            | EF hand calcium binding protein 1                           |
| Tff2               | trefoil factor 2 (spasmodic protein 1)                      |
| Cpt1a              | carnitine palmitoyltransferase 1a, liver                    |
| 8430406i07Rik      | RIKEN cDNA 8430406i07 gene                                  |
| Vat1               | vesicle amine transport protein 1 homolog (T californica)   |
| Vat1               | Vesicle amine transport protein 1 homolog (T californica)   |
| Sema3d             | sema domain, immunoglobulin domain (Ig), short basic 3D     |
| Tbc1d15            | TBC1 domain family, member 15                               |
| Abi3bp             | ABI gene family, member 3 (NESH) binding protein            |
| Abi3bp             | ABI gene family, member 3 (NESH) binding protein            |
| Fmo1               | flavin containing monooxygenase 1                           |
| Col4a3             | procollagen, type IV, alpha 3                               |
| Col4a4             | procollagen, type IV, alpha 4                               |
| Col4a3             | procollagen, type IV, alpha 3                               |
| Tpp1               | tripeptidyl peptidase 1                                     |
| Nid1               | nidogen 1                                                   |
| Pcolce             | procollagen C-endopeptidase enhancer protein                |
| Pcolce             | procollagen C-endopeptidase enhancer protein                |
| Ndufs1             | NADH dehydrogenase (ubiquinone) Fe-S protein 1              |
| Alb                | albumin                                                     |
| Calcb              | calcitonin-related polypeptide, beta                        |
| Cry1l              | crystallin, lambda 1                                        |
| Cyp4v3             | cytochrome P450, family 4, subfamily v, polypeptide 3       |
| Cyp4v3             | cytochrome P450, family 4, subfamily v, polypeptide 3       |
| Echdc3             | enoyl Coenzyme A hydratase domain containing 3              |
| Acox1              | acyl-Coenzyme A oxidase 1, palmitoyl                        |
| Islr               | immunoglobulin superfamily containing leucine-rich repeat   |
| Loxl1              | lysyl oxidase-like 1                                        |
| P4ha3              | procollagen-proline, 2-oxoglutarate 4-dioxygenase           |
| Hspg2              | perlecan (heparan sulfate proteoglycan 2)                   |
| Col4a2             | procollagen, type IV, alpha 2                               |
| Bmp1               | bone morphogenetic protein 1                                |
| Cabc1              | chaperone, ABC1 activity of bcl complex like (S. pombe)     |
| Loxl1              | lysyl oxidase-like 1                                        |
| Spon1              | spondin 1, (f-spondin) extracellular matrix protein         |
| Spon1              | spondin 1, (f-spondin) extracellular matrix protein         |
| Cx3c1              | chemokine (C-X3-C motif) ligand 1                           |
| LOC640441 // Thbs1 | thrombospondin 1 // similar to thrombospondin 1             |
| LOC640441 // Thbs1 | thrombospondin 1 // similar to thrombospondin 1             |
| Aox4               | aldehyde oxidase 4                                          |
| 4933406E20Rik      | RIKEN cDNA 4933406E20 gene                                  |
| Sfrp1              | secreted frizzled-related protein 1                         |
| Tomm40l            | translocase of outer mitochondrial membrane 40              |
| No13               | nucleolar protein 3 (apoptosis repressor with CARD domain)  |
| No13               | nucleolar protein 3 (apoptosis repressor with CARD domain)  |
| Crim1              | cysteine rich transmembrane BMP regulator 1 (chordin like)  |
| Spnb1              | spectrin beta 1                                             |
| Cpxm1              | carboxypeptidase X 1 (M14 family)                           |
| Spon2              | spondin 2, extracellular matrix protein                     |
| Cntf // Zfp91-cntf | ciliary neurotrophic factor // zinc finger protein 91       |
| Akr1b8             | aldo-keto reductase family 1, member B8                     |
| Pycr1              | pyrroline-5-carboxylate reductase 1                         |
| Mmmachc            | methylmalonic aciduria cblC type, with homocystinuria       |
| Wnt5b              | wingless-related MMTV integration site 5B                   |
| Aldh18a1           | aldehyde dehydrogenase 18 family, member A1                 |
| Aldh18a1           | aldehyde dehydrogenase 18 family, member A1                 |
| Cat                | catalase                                                    |
| Slc25a23           | solute carrier family 25, member 23                         |
| Ywhaz              | tyrosine 3-monooxygenase/tryptophan 5-monooxy, zeta         |
| Slc25a36           | solute carrier family 25, member 36                         |
| Mtfmt              | mitochondrial methionyl-tRNA formyltransferase              |
| Lama1              | laminin, alpha 1                                            |
| Htra3              | HtrA serine peptidase 3                                     |
| Arsi               | arylsulfatase 1                                             |
| Emilin3            | elastin microfibril interfacer 3                            |
| Ccbe1              | collagen and calcium binding EGF domains 1                  |
| Ccbe1              | collagen and calcium binding EGF domains 1                  |
| Sulf1              | sulfatase 1                                                 |
| Npnt               | Nephronectin                                                |
| Slt3               | slit homolog 3 (Drosophila)                                 |
| Nid1               | nidogen 1                                                   |
| Col4a1             | procollagen, type IV, alpha 1                               |
| Gprc5c             | G protein-coupled receptor, family C, group 5, member C     |
| Golp3              | golgi phosphoprotein 3                                      |
| Igfbp5             | insulin-like growth factor binding protein 5                |
| 4833409A17Rik      | RIKEN cDNA 4833409A17 gene                                  |
| Vldlr              | very low density lipoprotein receptor                       |
| Adk                | adenosine kinase                                            |
| Adamts12           | a disintegrin-like metallopeptidase with thrombospondin, 12 |
| Dhcr7              | 7-dehydrocholesterol reductase                              |
| Adamts18           | a disintegrin-like metallopeptidase with thrombospondin, 18 |
| 9130404D08Rik      | RIKEN cDNA 9130404D08 gene                                  |
| Bzrap1             | benzodiazapine receptor associated protein 1                |
| Emid1              | EMI domain containing 1                                     |
| Metrn1             | metetrin, glial cell differentiation regulator-like         |
| Alox12e            | arachidonate lipoxygenase, epidermal                        |
| C130034118Rik      | RIKEN cDNA C130034118 gene                                  |
| Mecp2              | methyl CpG binding protein 2                                |
| Bcl2               | B-cell leukemia/lymphoma 2                                  |
| Matn2              | matrilin 2                                                  |
| Matn2              | matrilin 2                                                  |
| Adamts4            | a disintegrin-like metallopeptidase with thrombospondin, 4  |
